## Novel tool for predicting residual stroke risk in atrial fibrillation: mCARS

Ding WY.<sup>1</sup>; Rivera-Caravaca JM.<sup>1</sup>; Marin F.<sup>2</sup>; Torp-Pedersen C.<sup>3</sup>; Roldan V.<sup>2</sup>; Lip GYH<sup>1</sup>

<sup>1</sup>University of Liverpool, Liverpool, United Kingdom of Great Britain & Northern Ireland

<sup>2</sup>University of Murcia, Murcia, Spain

<sup>3</sup>Aalborg University Hospital, Aalborg, Denmark

**Funding Acknowledgements:** Type of funding sources: None.

**Background:** Recently, CARS was proposed to predict 1-year absolute stroke risk in non-anticoagulated patients with atrial fibrillation (AF). We aimed to determine whether a modified CARS (mCARS) may be used to assess the residual stroke risk in anticoagulated AF patients.

**Methods:** We studied patient-level data of anticoagulated AF patients from the real-world Murcia AF Project and AMADEUS clinical trial. Individual mCARS was estimated for each patient using an estimated 64% risk reduction with anticoagulation.

**Results:** 3,503 patients were included (2,205 [62.9%] clinical trial and 1,298 [37.1%] real-world). In the clinical trial cohort, the median age was 71 (IQR 65-77) and CHA<sub>2</sub>DS<sub>2</sub>-VASc score 3 (IQR 2-4). In the real-world cohort, the median age was 76 (IQR 70-81) and CHA<sub>2</sub>DS<sub>2</sub>-VASc score 4 (IQR 3-5).

At 1-year, there were 40 and 31 stroke events in the clinical trial and real-world cohorts, respectively. Average predicted residual stroke risk by mCARS was identical to actual stroke risk (1.8 [±1.8%] vs. 1.8% [95% CI, 1.3-2.4]) in the clinical trial, and broadly similar in the real-world (2.1 [±1.9%] vs. 2.4% [95% CI, 1.6-3.4]). Additionally, these values were comparable across the subgroups stratified by CHA<sub>2</sub>DS<sub>2</sub>-VASc score in both cohorts.

AUCs of mCARS for prediction of stroke events in the clinical trial and real-world were 0.678 (95% CI, 0.598-0.758) and 0.712 (95% CI, 0.618-0.805), respectively. In an exploratory analysis, we found that mCARS was able to refine stroke risk estimation for each point of the CHA<sub>2</sub>DS<sub>2</sub>-VASc score in both cohorts.

**Conclusion:** Personalised residual 1-year absolute stroke risk in anticoagulated AF patients may be estimated using mCARS. Such patients with high residual stroke risk may benefit from more aggressive interventions and follow-up.

Absolute 1-year stroke risk

|                                                | Clinical Trial     |             | Real-World         |             |
|------------------------------------------------|--------------------|-------------|--------------------|-------------|
|                                                | Median (IQR)       | Range       | Median (IQR)       | Range       |
| CHA <sub>2</sub> DS <sub>2</sub> -VASc score 0 | NA                 |             | 0.9 (0.6 - 1.3)    | 0.2 - 1.4   |
| CHA <sub>2</sub> DS <sub>2</sub> -VASc score 1 | 1.1 (0.7 - 1.4)    | 0.2 - 2.0   | 1.4 (0.9 - 1.7)    | 0.2 - 13.0  |
| CHA <sub>2</sub> DS <sub>2</sub> -VASc score 2 | 2.0 (1.5 - 2.4)    | 0.3 - 10.8  | 2.1 (1.5 - 2.6)    | 0.3 - 10.8  |
| CHA <sub>2</sub> DS <sub>2</sub> -VASc score 3 | 2.6 (2.1 - 3.4)    | 0.4 - 13.3  | 2.8 (2.5 - 3.4)    | 0.9 - 13.3  |
| CHA <sub>2</sub> DS <sub>2</sub> -VASc score 4 | 3.6 (2.8 - 5.6)    | 0.3 - 18.1  | 3.9 (3.3 - 5.0)    | 1.1 - 21.0  |
| CHA <sub>2</sub> DS <sub>2</sub> -VASc score 5 | 6.7 (3.6 - 14.0)   | 1.9 - 20.9  | 4.8 (3.9 - 12.2)   | 1.2 - 21.0  |
| CHA <sub>2</sub> DS <sub>2</sub> -VASc score 6 | 13.6 (5.5 - 15.8)  | 2.4 - 21.8  | 12.8 (4.8 - 16.7)  | 2.2 - 21.8  |
| CHA <sub>2</sub> DS <sub>2</sub> -VASc score 7 | 15.7 (14.5 - 17.4) | 4.5 - 21.9  | 15.6 (5.9 - 17.5)  | 4.1 - 23.5  |
| CHA <sub>2</sub> DS <sub>2</sub> -VASc score 8 | 16.5 (14.0 - 18.5) | 13.1 - 20.3 | 16.9 (15.7 - 19.5) | 13.6 - 21.0 |

IQR, interquartile range; NA, not applicable.
